# Supplementary material for: Precise determination of Os isotope ratios in the 15–4000 pg range using a sparging method using enhanced-sensitivity multiple Faraday collector-inductively coupled plasma-mass spectrometry
Source: Royal Society of Chemistry journal article supplement (doi:10.1039/c4ja00092g), 2014-01-01
Supplement: c4ja00092g1.pdf [file c4ja00092g1.pdf]

†E.S.I. Data Table 1 All analytical results of JMC Os standard solution at various concentrations

| Day        | Conc. (pg) | <sup>187</sup> Os/ V | <sup>188</sup> Os/ V | <sup>190</sup> Os/ V | <sup>192</sup> Os/ V | <sup>186</sup> Os/ <sup>188</sup> Os | 2SE     | <sup>187</sup> Os/ <sup>188</sup> Os | 2SE     | <sup>189</sup> Os/ <sup>188</sup> Os | 2SE     | <sup>190</sup> Os/ <sup>188</sup> Os | 2SE     | <sup>192</sup> Os/ <sup>188</sup> Os | 2SE     |
|------------|------------|----------------------|----------------------|----------------------|----------------------|--------------------------------------|---------|--------------------------------------|---------|--------------------------------------|---------|--------------------------------------|---------|--------------------------------------|---------|
| [Day1]     | 50         | 0.00007              | 0.00068              | 0.00136              | 0.00213              | 0.12435                              | 0.00233 | 0.10264                              | 0.00352 | 1.22013                              | 0.00223 | 1.97856                              | 0.00281 | 3.12023                              | 0.00724 |
| [Day1]     | 50         | 0.00009              | 0.00088              | 0.00175              | 0.00273              | 0.12195                              | 0.00180 | 0.10461                              | 0.00261 | 1.22400                              | 0.00205 | 1.98825                              | 0.00279 | 3.11985                              | 0.00548 |
| [Day1]     | 50         | 0.00009              | 0.00079              | 0.00157              | 0.00246              | 0.12211                              | 0.00164 | 0.11014                              | 0.00287 | 1.22254                              | 0.00229 | 1.98191                              | 0.00288 | 3.10842                              | 0.00599 |
| [Day1]     | 50         | 0.00009              | 0.00087              | 0.00174              | 0.00270              | 0.11475                              | 0.00167 | 0.10841                              | 0.00238 | 1.21978                              | 0.00226 | 1.98519                              | 0.00304 | 3.09954                              | 0.00802 |
| [Day1]     | 50         | 0.00008              | 0.00082              | 0.00164              | 0.00256              | 0.11122                              | 0.00265 | 0.10072                              | 0.00317 | 1.21942                              | 0.00238 | 1.98512                              | 0.00289 | 3.10147                              | 0.00630 |
| AVG/ 2SD   |            |                      |                      |                      |                      | 0.11888                              | 0.01120 | 0.10530                              | 0.00785 | 1.22118                              | 0.00399 | 1.98381                              | 0.00738 | 3.10990                              | 0.01965 |
| [Day3]     | 50         | 0.00018              | 0.00168              | 0.00337              | 0.00528              | 0.12002                              | 0.00102 | 0.10616                              | 0.00072 | 1.22125                              | 0.00094 | 1.98490                              | 0.00178 | 3.14040                              | 0.00306 |
| [Day3]     | 50         | 0.00016              | 0.00155              | 0.00309              | 0.00484              | 0.12200                              | 0.00094 | 0.10684                              | 0.00085 | 1.21986                              | 0.00114 | 1.98262                              | 0.00184 | 3.12959                              | 0.00308 |
| [Day3]     | 50         | 0.00015              | 0.00139              | 0.00278              | 0.00437              | 0.12052                              | 0.00121 | 0.10767                              | 0.00096 | 1.21989                              | 0.00123 | 1.97939                              | 0.00190 | 3.13991                              | 0.00344 |
| [Day3]     | 50         | 0.00015              | 0.00140              | 0.00280              | 0.00439              | 0.11579                              | 0.00163 | 0.10550                              | 0.00095 | 1.21992                              | 0.00125 | 1.98231                              | 0.00214 | 3.13284                              | 0.00389 |
| [Day3]     | 50         | 0.00015              | 0.00139              | 0.00278              | 0.00435              | 0.11899                              | 0.00122 | 0.10668                              | 0.00089 | 1.21476                              | 0.00144 | 1.97932                              | 0.00198 | 3.11828                              | 0.00428 |
| AVG/ 2SD   |            |                      |                      |                      |                      | 0.11946                              | 0.00464 | 0.10657                              | 0.00161 | 1.21914                              | 0.00504 | 1.98171                              | 0.00474 | 3.13220                              | 0.01810 |
| [Day4]     | 50         | 0.00021              | 0.00194              | 0.00388              | 0.00609              | 0.11960                              | 0.00093 | 0.10737                              | 0.00072 | 1.21946                              | 0.00093 | 1.98336                              | 0.00132 | 3.13608                              | 0.00236 |
| [Day4]     | 50         | 0.00019              | 0.00181              | 0.00362              | 0.00567              | 0.12080                              | 0.00111 | 0.10756                              | 0.00082 | 1.22021                              | 0.00115 | 1.98253                              | 0.00143 | 3.13384                              | 0.00289 |
| [Day4]     | 50         | 0.00019              | 0.00181              | 0.00362              | 0.00566              | 0.12119                              | 0.00089 | 0.10602                              | 0.00080 | 1.21884                              | 0.00132 | 1.98417                              | 0.00166 | 3.13010                              | 0.00261 |
| [Day4]     | 50         | 0.00018              | 0.00171              | 0.00342              | 0.00537              | 0.12054                              | 0.00110 | 0.10783                              | 0.00092 | 1.22075                              | 0.00120 | 1.98084                              | 0.00153 | 3.14264                              | 0.00301 |
| [Day4]     | 50         | 0.00018              | 0.00170              | 0.00340              | 0.00533              | 0.11941                              | 0.00127 | 0.10695                              | 0.00090 | 1.21948                              | 0.00115 | 1.98089                              | 0.00163 | 3.13980                              | 0.00291 |
| AVG/ 2SD   |            | 0.00019              | 0.00179              | 0.00359              | 0.00563              | 0.12031                              | 0.00154 | 0.10715                              | 0.00141 | 1.21975                              | 0.00148 | 1.98236                              | 0.00296 | 3.13649                              | 0.00984 |
| G.AVG/ 2SD |            |                      |                      |                      |                      | 0.11955                              | 0.00144 | 0.10634                              | 0.00189 | 1.22002                              | 0.00209 | 1.98263                              | 0.00215 | 3.12620                              | 0.02855 |
| [Day1]     | 100        | 0.00020              | 0.00192              | 0.00383              | 0.00596              | 0.11870                              | 0.00064 | 0.10610                              | 0.00119 | 1.22076                              | 0.00108 | 1.98379                              | 0.00115 | 3.09939                              | 0.00277 |
| [Day1]     | 100        | 0.00020              | 0.00189              | 0.00376              | 0.00586              | 0.11977                              | 0.00072 | 0.10710                              | 0.00133 | 1.22309                              | 0.00107 | 1.98487                              | 0.00157 | 3.10333                              | 0.00291 |
| [Day1]     | 100        | 0.00019              | 0.00182              | 0.00363              | 0.00565              | 0.11985                              | 0.00096 | 0.10582                              | 0.00164 | 1.21923                              | 0.00108 | 1.98452                              | 0.00152 | 3.09738                              | 0.00332 |
| [Day1]     | 100        | 0.00020              | 0.00185              | 0.00369              | 0.00575              | 0.12049                              | 0.00094 | 0.10816                              | 0.00129 | 1.22007                              | 0.00119 | 1.98351                              | 0.00154 | 3.09913                              | 0.00315 |
| [Day1]     | 100        | 0.00019              | 0.00183              | 0.00364              | 0.00566              | 0.11973                              | 0.00079 | 0.10618                              | 0.00120 | 1.21957                              | 0.00096 | 1.98446                              | 0.00132 | 3.09512                              | 0.00376 |
| AVG/ 2SD   |            |                      |                      |                      |                      | 0.11971                              | 0.00128 | 0.10667                              | 0.00192 | 1.22055                              | 0.00307 | 1.98423                              | 0.00112 | 3.09887                              | 0.00604 |
| [Day3]     | 100        | 0.00027              | 0.00251              | 0.00503              | 0.00789              | 0.12062                              | 0.00072 | 0.10717                              | 0.00053 | 1.22026                              | 0.00077 | 1.98400                              | 0.00100 | 3.14152                              | 0.00193 |
| [Day3]     | 100        | 0.00028              | 0.00261              | 0.00522              | 0.00818              | 0.12156                              | 0.00061 | 0.10725                              | 0.00056 | 1.22174                              | 0.00080 | 1.98333                              | 0.00107 | 3.13672                              | 0.00193 |
| [Day3]     | 100        | 0.00026              | 0.00243              | 0.00487              | 0.00764              | 0.12047                              | 0.00079 | 0.10754                              | 0.00056 | 1.22128                              | 0.00077 | 1.98453                              | 0.00120 | 3.14317                              | 0.00195 |
| [Day3]     | 100        | 0.00027              | 0.00257              | 0.00514              | 0.00805              | 0.12109                              | 0.00062 | 0.10688                              | 0.00048 | 1.21905                              | 0.00058 | 1.98508                              | 0.00097 | 3.13660                              | 0.00152 |
| [Day3]     | 100        | 0.00026              | 0.00248              | 0.00497              | 0.00779              | 0.11811                              | 0.00057 | 0.10675                              | 0.00053 | 1.22173                              | 0.00070 | 1.98355                              | 0.00109 | 3.14005                              | 0.00208 |
| AVG/ 2SD   |            |                      |                      |                      |                      | 0.12037                              | 0.00267 | 0.10712                              | 0.00062 | 1.22081                              | 0.00231 | 1.98410                              | 0.00143 | 3.13961                              | 0.00583 |
| [Day4]     | 100        | 0.00037              | 0.00346              | 0.00692              | 0.01084              | 0.12103                              | 0.00047 | 0.10726                              | 0.00044 | 1.21945                              | 0.00062 | 1.98407                              | 0.00074 | 3.13664                              | 0.00144 |
| [Day4]     | 100        | 0.00035              | 0.00331              | 0.00663              | 0.01040              | 0.11915                              | 0.00061 | 0.10719                              | 0.00045 | 1.22069                              | 0.00062 | 1.98426                              | 0.00085 | 3.13875                              | 0.00128 |
| [Day4]     | 100        | 0.00037              | 0.00344              | 0.00688              | 0.01078              | 0.12098                              | 0.00064 | 0.10723                              | 0.00040 | 1.21951                              | 0.00051 | 1.98335                              | 0.00093 | 3.13472                              | 0.00118 |
| [Day4]     | 100        | 0.00036              | 0.00342              | 0.00685              | 0.01074              | 0.12082                              | 0.00064 | 0.10637                              | 0.00040 | 1.21893                              | 0.00051 | 1.98254                              | 0.00093 | 3.13538                              | 0.00118 |
| [Day4]     | 100        | 0.00035              | 0.00331              | 0.00664              | 0.01040              | 0.11991                              | 0.00053 | 0.10643                              | 0.00045 | 1.22128                              | 0.00070 | 1.98550                              | 0.00088 | 3.14097                              | 0.00174 |
| AVG/ 2SD   |            | 0.00036              | 0.00339              | 0.00678              | 0.01063              | 0.12038                              | 0.00164 | 0.10690                              | 0.00091 | 1.21997                              | 0.00195 | 1.98394                              | 0.00220 | 3.13729                              | 0.00514 |
| G.AVG/ 2SD |            |                      |                      |                      |                      | 0.12015                              | 0.00077 | 0.10689                              | 0.00045 | 1.22044                              | 0.00086 | 1.98409                              | 0.00029 | 3.12526                              | 0.04577 |

Table 1. Continue

| Day        | Conc. (pg) | <sup>187</sup> Os/ V | <sup>188</sup> Os/ V | <sup>190</sup> Os/ V | <sup>192</sup> Os/ V | <sup>186</sup> Os/ <sup>188</sup> Os | 2SE     | <sup>187</sup> Os/ <sup>188</sup> Os | 2SE     | <sup>189</sup> Os/ <sup>188</sup> Os | 2SE     | <sup>190</sup> Os/ <sup>188</sup> Os | 2SE     | <sup>192</sup> Os/ <sup>188</sup> Os | 2SE     |
|------------|------------|----------------------|----------------------|----------------------|----------------------|--------------------------------------|---------|--------------------------------------|---------|--------------------------------------|---------|--------------------------------------|---------|--------------------------------------|---------|
| [Day1]     | 200        | 0.00043              | 0.00406              | 0.00807              | 0.01258              | 0.11925                              | 0.00046 | 0.10620                              | 0.00059 | 1.21938                              | 0.00048 | 1.98258                              | 0.00069 | 3.09429                              | 0.00192 |
| [Day1]     | 200        | 0.00044              | 0.00405              | 0.00806              | 0.01255              | 0.11996                              | 0.00042 | 0.10783                              | 0.00063 | 1.22009                              | 0.00066 | 1.98601                              | 0.00061 | 3.09561                              | 0.00156 |
| [Day1]     | 200        | 0.00042              | 0.00396              | 0.00788              | 0.01227              | 0.11995                              | 0.00037 | 0.10747                              | 0.00057 | 1.21949                              | 0.00042 | 1.98478                              | 0.00066 | 3.09345                              | 0.00187 |
| [Day1]     | 200        | 0.00042              | 0.00389              | 0.00772              | 0.01203              | 0.11933                              | 0.00040 | 0.10759                              | 0.00073 | 1.22020                              | 0.00056 | 1.98354                              | 0.00065 | 3.09478                              | 0.00173 |
| [Day1]     | 200        | 0.00043              | 0.00399              | 0.00793              | 0.01236              | 0.11961                              | 0.00040 | 0.10700                              | 0.00055 | 1.21875                              | 0.00046 | 1.98286                              | 0.00061 | 3.09183                              | 0.00196 |
| AVG/ 2SD   |            |                      |                      |                      |                      | 0.11962                              | 0.00067 | 0.10722                              | 0.00129 | 1.21958                              | 0.00118 | 1.98395                              | 0.00286 | 3.09399                              | 0.00288 |
| [Day3]     | 200        | 0.00053              | 0.00496              | 0.00992              | 0.01555              | 0.12008                              | 0.00031 | 0.10671                              | 0.00024 | 1.21976                              | 0.00047 | 1.98216                              | 0.00061 | 3.13491                              | 0.00112 |
| [Day3]     | 200        | 0.00053              | 0.00502              | 0.01004              | 0.01575              | 0.11978                              | 0.00033 | 0.10672                              | 0.00023 | 1.21980                              | 0.00039 | 1.98300                              | 0.00053 | 3.13554                              | 0.00085 |
| [Day3]     | 200        | 0.00053              | 0.00495              | 0.00991              | 0.01553              | 0.12104                              | 0.00036 | 0.10676                              | 0.00025 | 1.21909                              | 0.00039 | 1.98272                              | 0.00049 | 3.13572                              | 0.00101 |
| [Day3]     | 200        | 0.00051              | 0.00478              | 0.00956              | 0.01499              | 0.11940                              | 0.00041 | 0.10745                              | 0.00030 | 1.22018                              | 0.00034 | 1.98408                              | 0.00061 | 3.13819                              | 0.00103 |
| [Day3]     | 200        | 0.00055              | 0.00514              | 0.01029              | 0.01614              | 0.12038                              | 0.00040 | 0.10714                              | 0.00024 | 1.21965                              | 0.00031 | 1.98383                              | 0.00047 | 3.13748                              | 0.00081 |
| AVG/ 2SD   |            |                      |                      |                      |                      | 0.12013                              | 0.00124 | 0.10696                              | 0.00066 | 1.21970                              | 0.00078 | 1.98316                              | 0.00159 | 3.13636                              | 0.00279 |
| [Day4]     | 200        | 0.00080              | 0.00747              | 0.01494              | 0.02344              | 0.11988                              | 0.00021 | 0.10720                              | 0.00021 | 1.21950                              | 0.00027 | 1.98273                              | 0.00041 | 3.13652                              | 0.00067 |
| [Day4]     | 200        | 0.00075              | 0.00709              | 0.01418              | 0.02223              | 0.11996                              | 0.00027 | 0.10665                              | 0.00023 | 1.21921                              | 0.00031 | 1.98300                              | 0.00045 | 3.13552                              | 0.00076 |
| [Day4]     | 200        | 0.00072              | 0.00677              | 0.01356              | 0.02125              | 0.12100                              | 0.00029 | 0.10701                              | 0.00023 | 1.22023                              | 0.00033 | 1.98400                              | 0.00044 | 3.13921                              | 0.00092 |
| [Day4]     | 200        | 0.00073              | 0.00690              | 0.01381              | 0.02165              | 0.12064                              | 0.00029 | 0.10671                              | 0.00022 | 1.21954                              | 0.00037 | 1.98374                              | 0.00054 | 3.13746                              | 0.00093 |
| [Day4]     | 200        | 0.00079              | 0.00740              | 0.01481              | 0.02322              | 0.12025                              | 0.00021 | 0.10740                              | 0.00020 | 1.21990                              | 0.00027 | 1.98270                              | 0.00040 | 3.13685                              | 0.00071 |
| AVG/ 2SD   |            | 0.00076              | 0.00713              | 0.01426              | 0.02236              | 0.12034                              | 0.00094 | 0.10699                              | 0.00064 | 1.21968                              | 0.00079 | 1.98323                              | 0.00120 | 3.13711                              | 0.00273 |
| G.AVG/ 2SD |            |                      |                      |                      |                      | 0.12003                              | 0.00074 | 0.10706                              | 0.00028 | 1.21965                              | 0.00012 | 1.98345                              | 0.00088 | 3.12249                              | 0.04937 |
| [Day1]     | 400        | 0.00093              | 0.00869              | 0.01728              | 0.02691              | 0.11966                              | 0.00017 | 0.10670                              | 0.00028 | 1.22028                              | 0.00026 | 1.98339                              | 0.00037 | 3.09516                              | 0.00107 |
| [Day1]     | 400        | 0.00091              | 0.00856              | 0.01700              | 0.02645              | 0.12011                              | 0.00018 | 0.10674                              | 0.00025 | 1.21959                              | 0.00025 | 1.98380                              | 0.00035 | 3.08904                              | 0.00100 |
| [Day1]     | 400        | 0.00090              | 0.00851              | 0.01683              | 0.02619              | 0.11868                              | 0.00019 | 0.10607                              | 0.00026 | 1.21493                              | 0.00052 | 1.97889                              | 0.00044 | 3.07148                              | 0.00251 |
| [Day1]     | 400        | 0.00090              | 0.00839              | 0.01671              | 0.02606              | 0.12016                              | 0.00018 | 0.10703                              | 0.00026 | 1.22068                              | 0.00029 | 1.98410                              | 0.00039 | 3.10777                              | 0.00087 |
| [Day1]     | 400        | 0.00091              | 0.00857              | 0.01707              | 0.02662              | 0.11979                              | 0.00015 | 0.10649                              | 0.00027 | 1.21976                              | 0.00024 | 1.98363                              | 0.00032 | 3.10474                              | 0.00105 |
| AVG/ 2SD   |            | 0.00072              | 0.00676              | 0.01346              | 0.02102              | 0.11992                              | 0.00119 | 0.10683                              | 0.00073 | 1.21939                              | 0.00307 | 1.98309                              | 0.00292 | 3.11579                              | 0.04697 |
| [Day2]     | 400        | 0.00109              | 0.01020              | 0.02036              | 0.03182              | 0.11951                              | 0.00015 | 0.10697                              | 0.00018 | 1.21960                              | 0.00019 | 1.98388                              | 0.00034 | 3.11914                              | 0.00077 |
| [Day2]     | 400        | 0.00101              | 0.00946              | 0.01887              | 0.02948              | 0.11958                              | 0.00016 | 0.10724                              | 0.00022 | 1.21878                              | 0.00029 | 1.98353                              | 0.00033 | 3.11378                              | 0.00095 |
| [Day2]     | 400        | 0.00094              | 0.00877              | 0.01749              | 0.02733              | 0.11971                              | 0.00017 | 0.10696                              | 0.00023 | 1.22049                              | 0.00023 | 1.98354                              | 0.00036 | 3.11410                              | 0.00083 |
| [Day2]     | 400        | 0.00090              | 0.00839              | 0.01671              | 0.02610              | 0.11938                              | 0.00020 | 0.10744                              | 0.00028 | 1.21897                              | 0.00024 | 1.98247                              | 0.00036 | 3.11113                              | 0.00109 |
| [Day2]     | 400        | 0.00088              | 0.00827              | 0.01647              | 0.02572              | 0.12012                              | 0.00018 | 0.10698                              | 0.00025 | 1.21982                              | 0.00024 | 1.98302                              | 0.00042 | 3.11067                              | 0.00100 |
| AVG/ 2SD   |            | 0.00092              | 0.00860              | 0.01711              | 0.02670              | 0.11969                              | 0.00085 | 0.10686                              | 0.00073 | 1.21930                              | 0.00312 | 1.98303                              | 0.00289 | 3.10480                              | 0.02848 |
| [Day3]     | 400        | 0.00121              | 0.01138              | 0.02275              | 0.03567              | 0.11994                              | 0.00013 | 0.10691                              | 0.00012 | 1.21981                              | 0.00020 | 1.98290                              | 0.00025 | 3.13632                              | 0.00049 |
| [Day3]     | 400        | 0.00123              | 0.01152              | 0.02304              | 0.03612              | 0.12003                              | 0.00018 | 0.10696                              | 0.00012 | 1.22028                              | 0.00019 | 1.98320                              | 0.00028 | 3.13691                              | 0.00050 |
| [Day3]     | 400        | 0.00123              | 0.01155              | 0.02310              | 0.03622              | 0.11998                              | 0.00017 | 0.10696                              | 0.00010 | 1.21978                              | 0.00019 | 1.98315                              | 0.00033 | 3.13611                              | 0.00052 |
| [Day3]     | 400        | 0.00120              | 0.01129              | 0.02259              | 0.03541              | 0.11968                              | 0.00016 | 0.10702                              | 0.00012 | 1.22019                              | 0.00019 | 1.98335                              | 0.00025 | 3.13728                              | 0.00045 |
| [Day3]     | 400        | 0.00125              | 0.01175              | 0.02350              | 0.03685              | 0.11975                              | 0.00015 | 0.10686                              | 0.00011 | 1.21994                              | 0.00017 | 1.98336                              | 0.00032 | 3.13691                              | 0.00043 |
| AVG/ 2SD   |            | 0.00122              | 0.01149              | 0.02300              | 0.03605              | 0.11988                              | 0.00030 | 0.10694                              | 0.00012 | 1.22000                              | 0.00046 | 1.98319                              | 0.00037 | 3.13671                              | 0.00095 |
| [Day4]     | 400        | 0.00153              | 0.01437              | 0.02873              | 0.04505              | 0.11979                              | 0.00010 | 0.10684                              | 0.00012 | 1.21933                              | 0.00014 | 1.98312                              | 0.00027 | 3.13565                              | 0.00046 |
| [Day4]     | 400        | 0.00161              | 0.01517              | 0.03034              | 0.04757              | 0.11972                              | 0.00012 | 0.10681                              | 0.00010 | 1.21970                              | 0.00016 | 1.98321                              | 0.00019 | 3.13630                              | 0.00041 |

Table 1. Continue

| Day                                                                        | Conc. (pg) | <sup>187</sup> Os/ V | <sup>188</sup> Os/ V | <sup>190</sup> Os/ V | <sup>192</sup> Os/ V | <sup>186</sup> Os/ <sup>188</sup> Os | 2SE     | <sup>187</sup> Os/ <sup>188</sup> Os | 2SE      | <sup>189</sup> Os/ <sup>188</sup> Os | 2SE     | <sup>190</sup> Os/ <sup>188</sup> Os | 2SE     | <sup>192</sup> Os/ <sup>188</sup> Os | 2SE     |
|----------------------------------------------------------------------------|------------|----------------------|----------------------|----------------------|----------------------|--------------------------------------|---------|--------------------------------------|----------|--------------------------------------|---------|--------------------------------------|---------|--------------------------------------|---------|
| [Day4]                                                                     | 400        | 0.00150              | 0.01409              | 0.02819              | 0.04420              | 0.11970                              | 0.00014 | 0.10684                              | 0.00009  | 1.21986                              | 0.00017 | 1.98343                              | 0.00025 | 3.13684                              | 0.00040 |
| [Day4]                                                                     | 400        | 0.00162              | 0.01524              | 0.03049              | 0.04779              | 0.11997                              | 0.00012 | 0.10687                              | 0.00010  | 1.21978                              | 0.00016 | 1.98343                              | 0.00025 | 3.13657                              | 0.00041 |
| [Day4]                                                                     | 400        | 0.00153              | 0.01436              | 0.02873              | 0.04505              | 0.11975                              | 0.00015 | 0.10702                              | 0.00010  | 1.21977                              | 0.00019 | 1.98318                              | 0.00021 | 3.13628                              | 0.00047 |
| AVG/ 2SD                                                                   |            | 0.00156              | 0.01464              | 0.02930              | 0.04593              | 0.11978                              | 0.00022 | 0.10688                              | 0.00017  | 1.21969                              | 0.00042 | 1.98327                              | 0.00029 | 3.13633                              | 0.00088 |
| G.AVG/ 2SD                                                                 |            |                      |                      |                      |                      | 0.11985                              | 0.00030 | 0.10687                              | 0.00011  | 1.21960                              | 0.00063 | 1.98314                              | 0.00022 | 3.12348                              | 0.03147 |
| [Day1]                                                                     | 2000       | 0.00468              | 0.04381              | 0.08717              | 0.13584              | 0.11986                              | 0.00003 | 0.10694                              | 0.00005  | 1.21974                              | 0.00008 | 1.98392                              | 0.00010 | 3.10034                              | 0.00055 |
| [Day1]                                                                     | 2000       | 0.00455              | 0.04264              | 0.08483              | 0.13218              | 0.11977                              | 0.00003 | 0.10689                              | 0.00005  | 1.21985                              | 0.00008 | 1.98385                              | 0.00010 | 3.09967                              | 0.00050 |
| [Day1]                                                                     | 2000       | 0.00417              | 0.03909              | 0.07776              | 0.12116              | 0.11983                              | 0.00004 | 0.10692                              | 0.00006  | 1.21997                              | 0.00009 | 1.98398                              | 0.00011 | 3.09907                              | 0.00047 |
| AVG/ 2SD                                                                   |            |                      |                      |                      |                      | 0.11982                              | 0.00009 | 0.10692                              | 0.00005  | 1.21985                              | 0.00023 | 1.98392                              | 0.00013 | 3.09970                              | 0.00127 |
| [Day3]                                                                     | 2000       | 0.00610              | 0.05734              | 0.11471              | 0.17985              | 0.11987                              | 0.00003 | 0.10688                              | 0.00003  | 1.21977                              | 0.00006 | 1.98306                              | 0.00008 | 3.13643                              | 0.00017 |
| [Day3]                                                                     | 2000       | 0.00620              | 0.05829              | 0.11661              | 0.18283              | 0.11974                              | 0.00003 | 0.10685                              | 0.00002  | 1.21979                              | 0.00006 | 1.98318                              | 0.00008 | 3.13628                              | 0.00014 |
| [Day3]                                                                     | 2000       | 0.00643              | 0.06041              | 0.12084              | 0.18945              | 0.11988                              | 0.00003 | 0.10687                              | 0.00003  | 1.21991                              | 0.00005 | 1.98320                              | 0.00008 | 3.13625                              | 0.00016 |
| [Day3]                                                                     | 2000       | 0.00613              | 0.05757              | 0.11516              | 0.18056              | 0.11984                              | 0.00003 | 0.10688                              | 0.00003  | 1.21988                              | 0.00005 | 1.98315                              | 0.00009 | 3.13664                              | 0.00015 |
| [Day3]                                                                     | 2000       | 0.00615              | 0.05784              | 0.11571              | 0.18140              | 0.11979                              | 0.00003 | 0.10685                              | 0.00003  | 1.21980                              | 0.00006 | 1.98314                              | 0.00008 | 3.13624                              | 0.00016 |
| AVG/ 2SD                                                                   |            |                      |                      |                      |                      | 0.11982                              | 0.00012 | 0.10687                              | 0.00003  | 1.21983                              | 0.00012 | 1.98315                              | 0.00011 | 3.13637                              | 0.00034 |
| [Day4]                                                                     | 2000       | 0.00834              | 0.07837              | 0.15675              | 0.24571              | 0.11979                              | 0.00003 | 0.10688                              | 0.00002  | 1.21971                              | 0.00005 | 1.98317                              | 0.00008 | 3.13497                              | 0.00027 |
| [Day4]                                                                     | 2000       | 0.00856              | 0.08042              | 0.16084              | 0.25210              | 0.11985                              | 0.00003 | 0.10687                              | 0.00002  | 1.21965                              | 0.00005 | 1.98322                              | 0.00007 | 3.13388                              | 0.00036 |
| [Day4]                                                                     | 2000       | 0.00824              | 0.07745              | 0.15493              | 0.24288              | 0.11986                              | 0.00002 | 0.10687                              | 0.00002  | 1.21964                              | 0.00005 | 1.98324                              | 0.00007 | 3.13554                              | 0.00021 |
| [Day4]                                                                     | 2000       | 0.00853              | 0.08014              | 0.16028              | 0.25125              | 0.11984                              | 0.00002 | 0.10687                              | 0.00002  | 1.21967                              | 0.00005 | 1.98317                              | 0.00008 | 3.13470                              | 0.00024 |
| [Day4]                                                                     | 2000       | 0.00813              | 0.07642              | 0.15288              | 0.23968              | 0.11981                              | 0.00002 | 0.10687                              | 0.00002  | 1.21974                              | 0.00006 | 1.98329                              | 0.00008 | 3.13632                              | 0.00018 |
| AVG/ 2SD                                                                   |            | 0.00836              | 0.07856              | 0.15714              | 0.24632              | 0.11983                              | 0.00006 | 0.10687                              | 0.00001  | 1.21968                              | 0.00008 | 1.98322                              | 0.00010 | 3.13508                              | 0.00183 |
| G.AVG/ 2SD                                                                 |            |                      |                      |                      |                      | 0.11982                              | 0.00001 | 0.10689                              | 0.00006  | 1.21979                              | 0.00018 | 1.98343                              | 0.00086 | 3.12372                              | 0.04162 |
| References                                                                 |            |                      |                      |                      |                      |                                      |         |                                      |          |                                      |         |                                      |         |                                      |         |
| N-TIMS (IFREE/ JAMSTEC); errors in 2SE                                     |            |                      |                      |                      |                      |                                      |         | 0.10684                              | 0.00002  |                                      |         |                                      |         |                                      |         |
| Makishima and Nakamura (2006); MC-ICP-MS by Faraday Cup; errors in 2SE     |            |                      |                      |                      |                      |                                      |         |                                      |          |                                      |         |                                      |         |                                      |         |
| MC-ICPMS                                                                   | 20         |                      |                      |                      |                      | 0.12033                              |         | 0.10715                              | 0.00185  | 1.22086                              |         |                                      |         |                                      |         |
| MC-ICPMS                                                                   | 200        |                      |                      |                      |                      | 0.11988                              |         | 0.10662                              | 0.00034  | 1.21967                              |         |                                      |         |                                      |         |
| MC-ICPMS                                                                   | 1000       |                      |                      |                      |                      | 0.11986                              |         | 0.10682                              | 0.00017  | 1.21976                              |         |                                      |         |                                      |         |
| MC-ICPMS                                                                   | 5000       |                      |                      |                      |                      | 0.11982                              |         | 0.10686                              | 0.00001  | 1.21977                              |         |                                      |         |                                      |         |
| MC-ICPMS                                                                   | 20000      |                      |                      |                      |                      | 0.11982                              |         | 0.10686                              | 0.000003 | 1.21978                              |         |                                      |         |                                      |         |
| Schoenberg et al. (2000); Sparging MC-ICP-MS by Faraday Cup; errors in 2SE |            |                      |                      |                      |                      |                                      |         |                                      |          |                                      |         |                                      |         |                                      |         |
| MC-ICPMS                                                                   | 50000      |                      |                      |                      |                      | 0.11983                              | 0.00002 | 0.10694                              | 0.00002  |                                      |         |                                      |         |                                      |         |
| TIMS                                                                       | n.a.       |                      |                      |                      |                      | 0.11983                              | 0.00001 | 0.10695                              | 0.00002  |                                      |         |                                      |         |                                      |         |
